# Supplementary material for: Aerobic oxidation of 2-aminophenol catalysed by a series of mononuclear copper(ii) complexes: phenoxazinone synthase-like activity and mechanistic study
Source: Royal Society of Chemistry journal article supplement (doi:10.1039/d0nj02558e), 2020-01-01
Supplement: d0nj02558e1.pdf [file d0nj02558e1.pdf]

## **Supporting Information**

### **Aerobic oxidation of 2-aminophenol catalysed by a series of mononuclear copper(II) complexes: phenoxazinone synthase-like activity and mechanistic study**

Nirmalya Podder and Sukanta Mandal\*

Department of Chemistry, Indian Institute of Technology Kharagpur, Kharagpur -721302, India.

Email: [sukanta.mandal@chem.iitkgp.ac.in](mailto:sukanta.mandal@chem.iitkgp.ac.in)

| <b>Table of contents</b>           | <b>Page no.</b> |
|------------------------------------|-----------------|
| Figure S1, Figure S2, Figure S3    | S3              |
| Figure S4, Figure S5, Figure S6    | S4              |
| Figure S7, Figure S8               | S5              |
| Figure S9, Figure S10              | S6              |
| Figure S11, Figure S12, Figure S13 | S7              |
| Figure S14, Figure S15             | S8              |
| Figure S16, Figure S17             | S9              |
| Figure S18, Figure S19             | S10             |
| Figure S20, Figure S21             | S11             |
| Figure S22, Figure S23, Figure S24 | S12             |
| Figure S25, Figure S26             | S13             |
| Figure S27, Figure S28             | S14             |
| Figure S29                         | S15             |
| Derivation of equation (2)         | S16             |

---

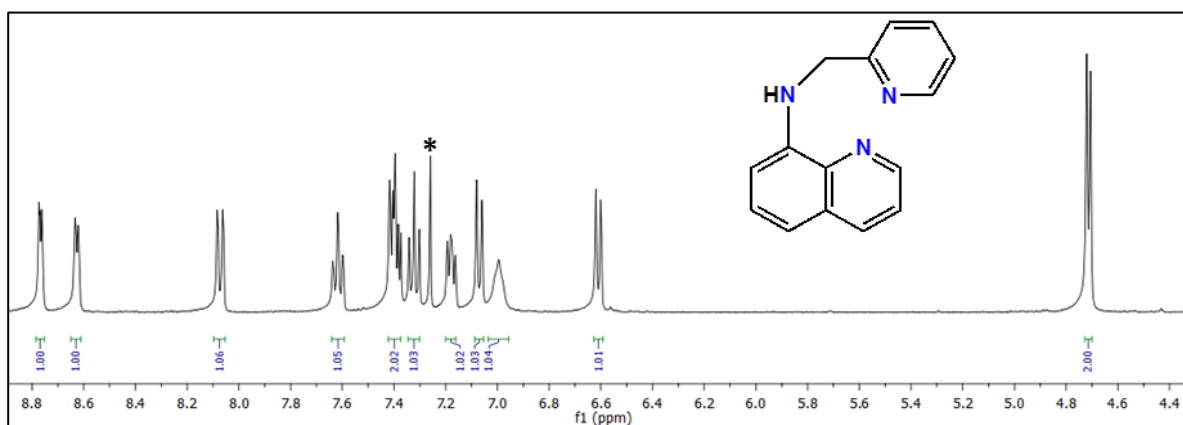

**Figure S1.**  $^1\text{H}$  NMR (400 MHz, 300 K) spectrum of ligand  $[\text{H}_2]\text{L}^1$  in  $\text{CDCl}_3$ . Asterisk (\*) denotes solvent residual peak.

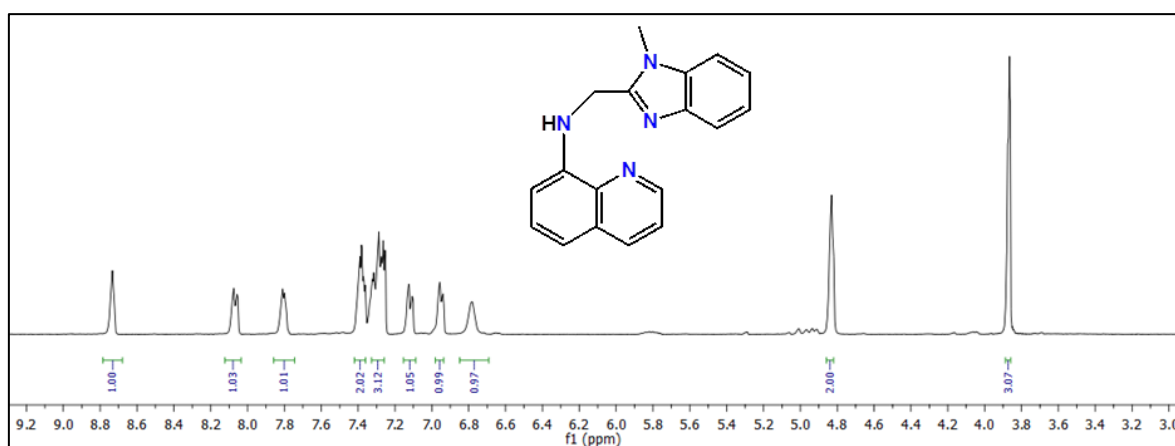

**Figure S2.**  $^1\text{H}$  NMR (400 MHz, 300 K) spectrum of ligand  $[\text{H}_2]\text{L}^2$  in  $\text{CDCl}_3$ .

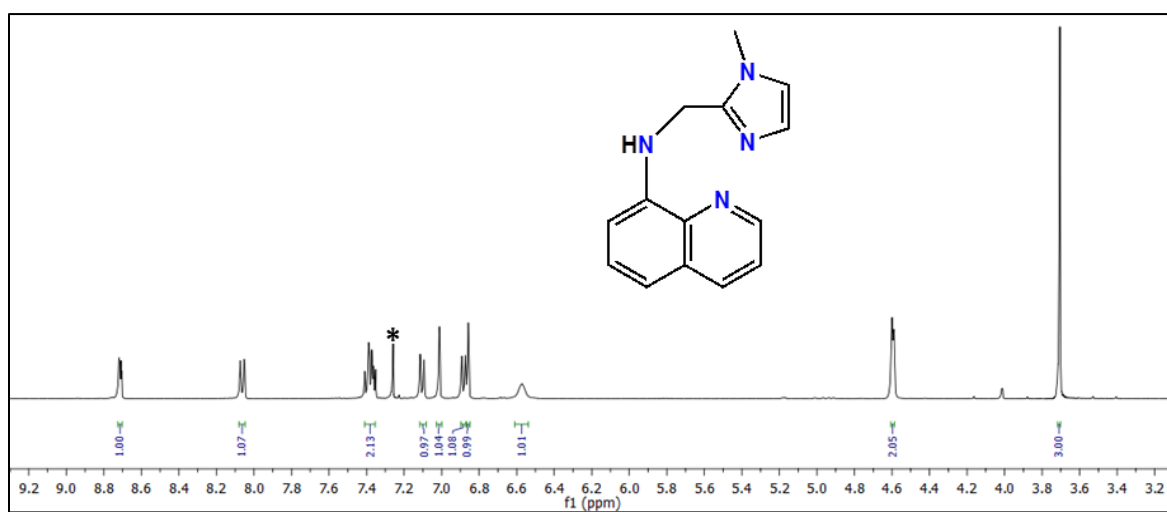

**Figure S3.**  $^1\text{H}$  NMR (400 MHz, 300 K) spectrum of ligand  $[\text{H}_2]\text{L}^3$  in  $\text{CDCl}_3$ . Asterisk (\*) denotes solvent residual peak.

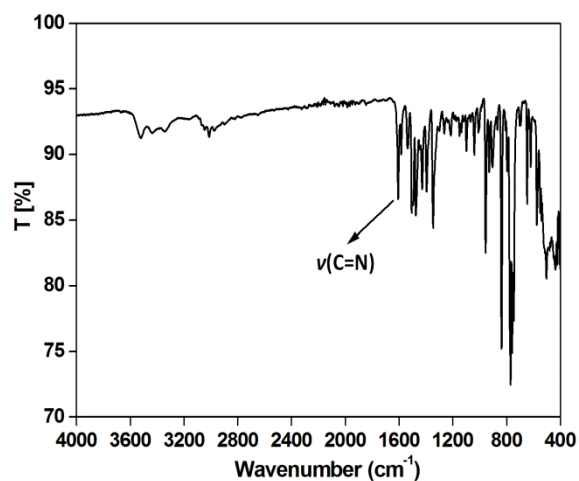

**Figure S4.** IR spectrum of complex  $[\text{Cu}(\text{L}^1)(\text{Cl})_2] \cdot \text{MeOH}$  ( $1 \cdot \text{MeOH}$ ).

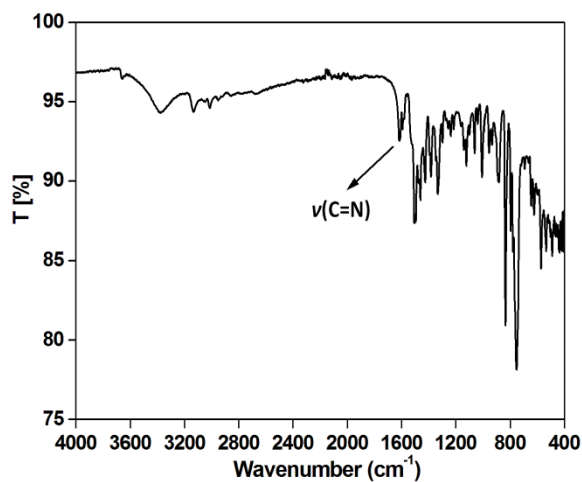

**Figure S5.** IR spectrum of complex  $[\text{Cu}(\text{L}^2)(\text{Cl})_2] \cdot \text{H}_2\text{O}$  ( $2 \cdot \text{H}_2\text{O}$ ).

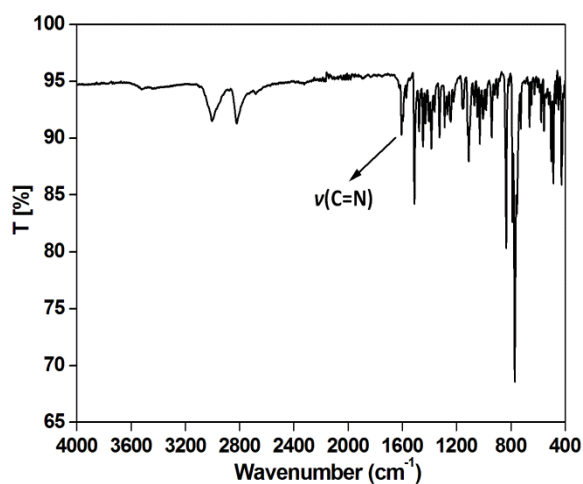

**Figure S6.** IR spectrum of complex  $[\text{Cu}(\text{L}^3)(\text{Cl})_2]$  ( $3$ ).

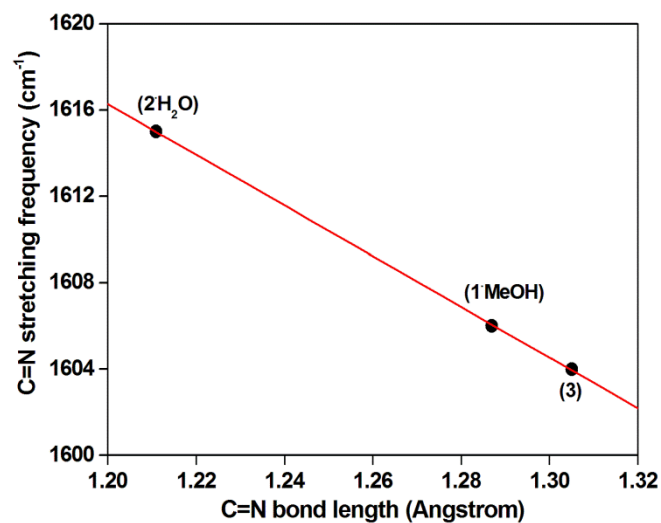

**Figure S7.** Correlation between imine C=N bond lengths and stretching frequencies for the copper(II) complexes **1**·MeOH, **2**·H<sub>2</sub>O and **3**.

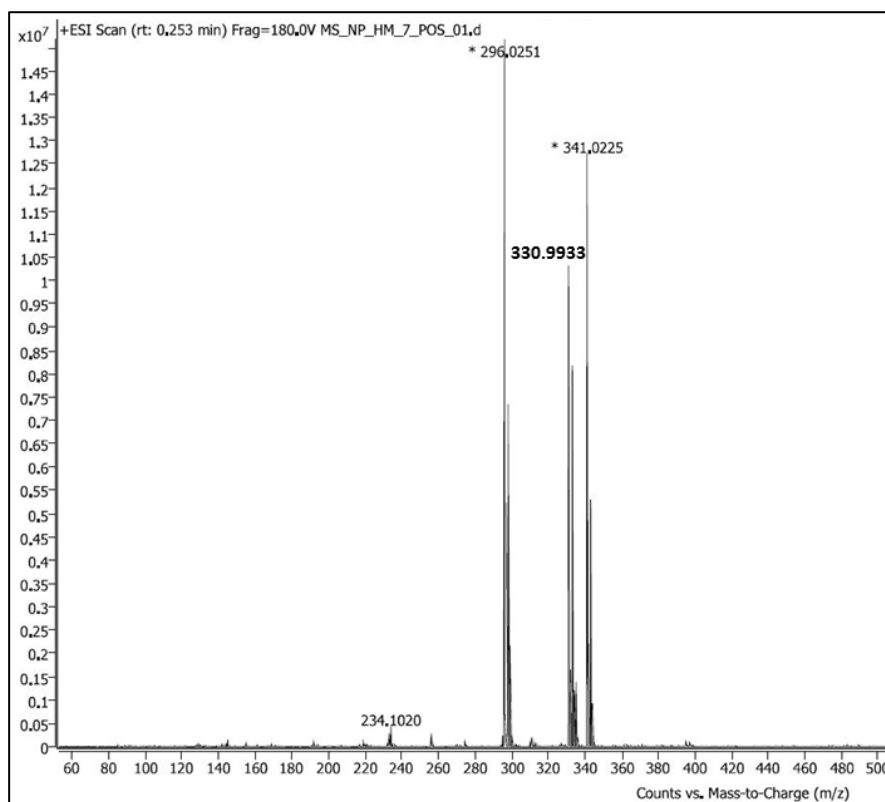

**Figure S8.** HRMS-ESI spectrum of complex [Cu(L<sup>1</sup>)(Cl)<sub>2</sub>]·MeOH (**1**·MeOH) in methanol with trace quantity of HCOOH. The *m/z* at 296.0251, 330.9933 and 341.0225 correspond to species [L<sup>1</sup>Cu]<sup>+</sup>, [L<sup>1</sup>CuCl]<sup>+</sup> and [L<sup>1</sup>Cu(HCOO)]<sup>+</sup>, respectively.

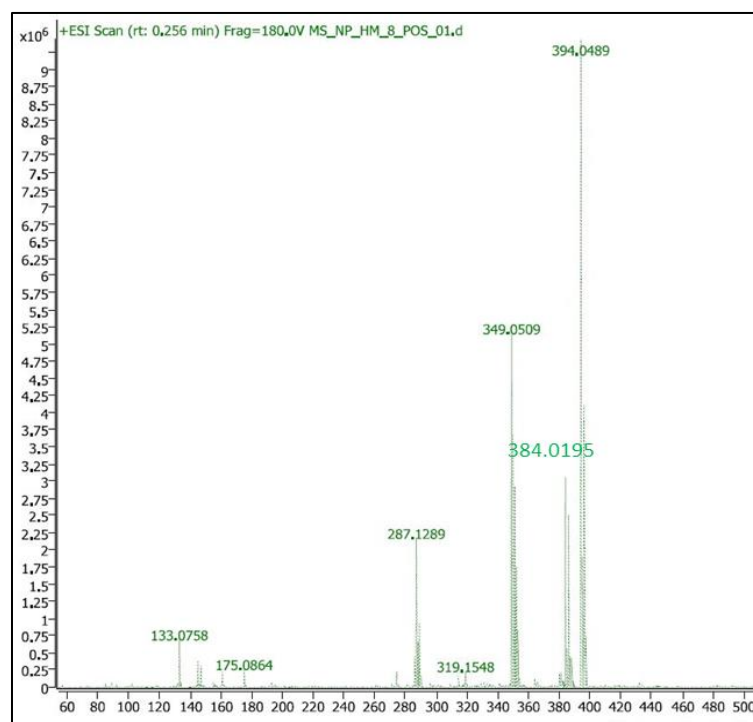

**Figure S9.** HRMS-ESI spectrum of complex  $[\text{Cu}(\text{L}^2)(\text{Cl})_2]\cdot\text{H}_2\text{O}$  ( $2\cdot\text{H}_2\text{O}$ ) in methanol with trace quantity of  $\text{HCOOH}$ . The  $m/z$  at 349.0509, 384.0195 and 394.0489 correspond to species  $[\text{L}^2\text{Cu}]^+$ ,  $[\text{L}^2\text{CuCl}]^+$  and  $[\text{L}^2\text{Cu}(\text{HCOO})]^+$ , respectively.

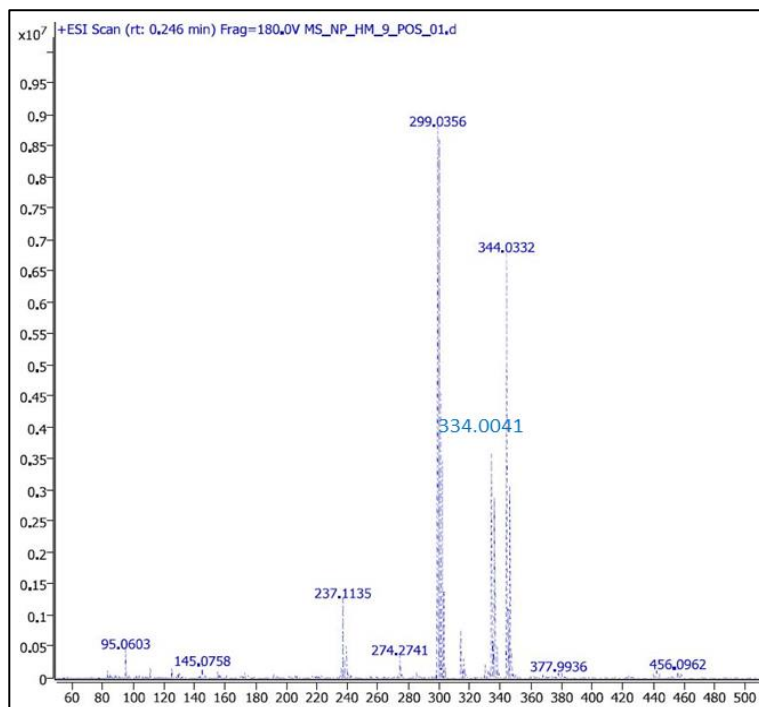

**Figure S10.** HRMS-ESI spectrum of complex  $[\text{Cu}(\text{L}^3)(\text{Cl})_2]$  (**3**) in methanol with trace quantity of  $\text{HCOOH}$ . The  $m/z$  at 299.0356, 334.0041 and 344.0332 correspond to species  $[\text{L}^3\text{Cu}]^+$ ,  $[\text{L}^3\text{CuCl}]^+$  and  $[\text{L}^3\text{Cu}(\text{HCOO})]^+$ , respectively.

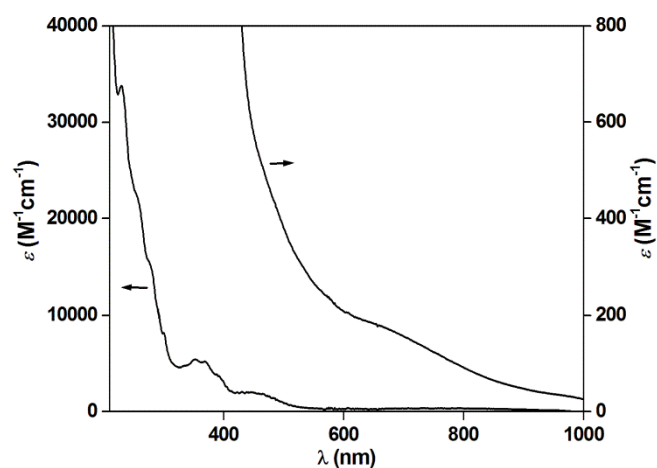

**Figure S11.** UV-vis spectrum of  $[\text{Cu}(\text{L}^1)(\text{Cl})_2] \cdot \text{MeOH}$  ( $1 \cdot \text{MeOH}$ ) in methanol.

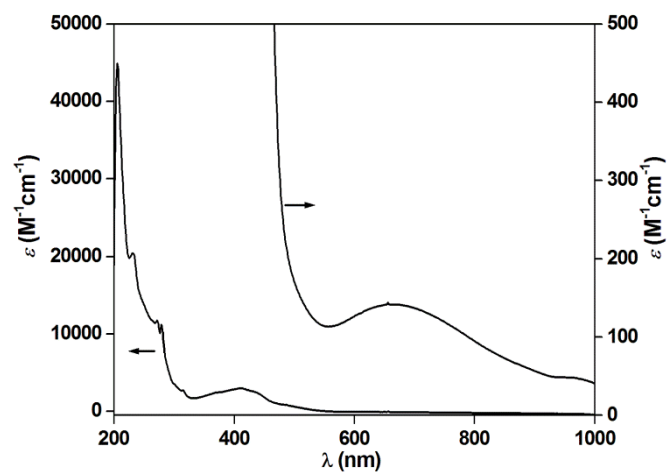

**Figure S12.** UV-vis spectrum of  $[\text{Cu}(\text{L}^2)(\text{Cl})_2] \cdot \text{H}_2\text{O}$  ( $2 \cdot \text{H}_2\text{O}$ ) in methanol.

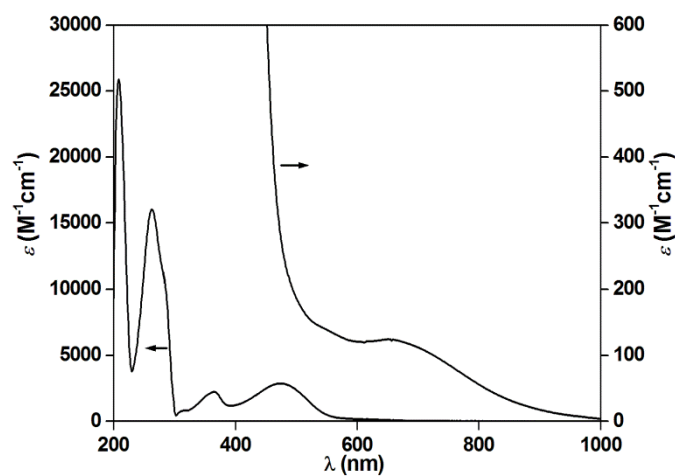

**Figure S13.** UV-vis spectrum of  $[\text{Cu}(\text{L}^3)(\text{Cl})_2]$  ( $3$ ) in methanol.

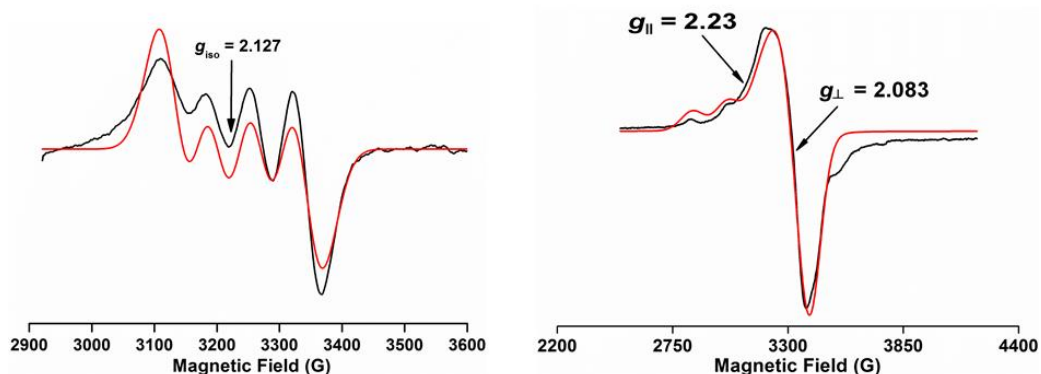

**Figure S14.** Experimental (black line) and simulated (red line) X-band EPR spectra of complex  $[\text{Cu}(\text{L}^1)(\text{Cl})_2]\cdot\text{MeOH}$  (**1·MeOH**) in methanol at 298 K (left) and 77 K (right). Microwave frequency  $\approx 9.61$  GHz (298 K) and 9.67 GHz (77 K), microwave power = 15 mW, modulation frequency = 5 kHz, modulation amplitude = 3 G. Simulated parameters: (298 K)  $g_{\text{iso}} = 2.127$ ,  $A_{\text{iso}} = 72.8$  G, line width = 7.2 mT; (77 K)  $g_{\parallel} = 2.23$ ,  $g_{\perp} = 2.083$ ,  $A_{\parallel} = 181$  G,  $A_{\perp} = 16.5$  G,  $(\text{line width})_{\parallel} = 1.19$  mT,  $(\text{line width})_{\perp} = 12.20$  mT.

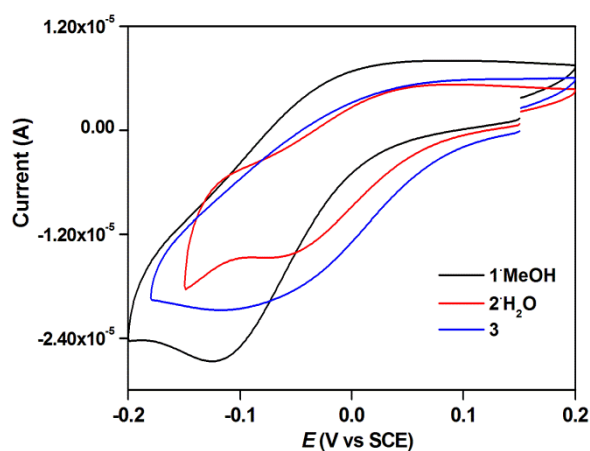

**Figure S15.** Cyclic voltammogram of copper(II) complexes in MeOH (scan rate: 100 mV/s; supporting electrolyte:  $\sim 0.1$  M LiCl).



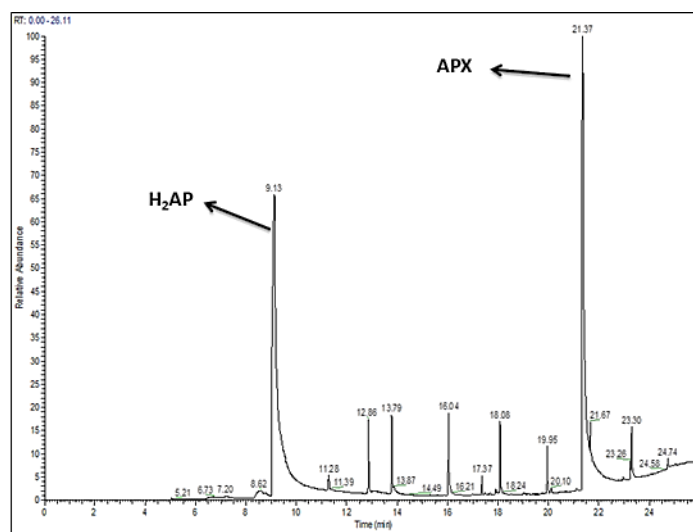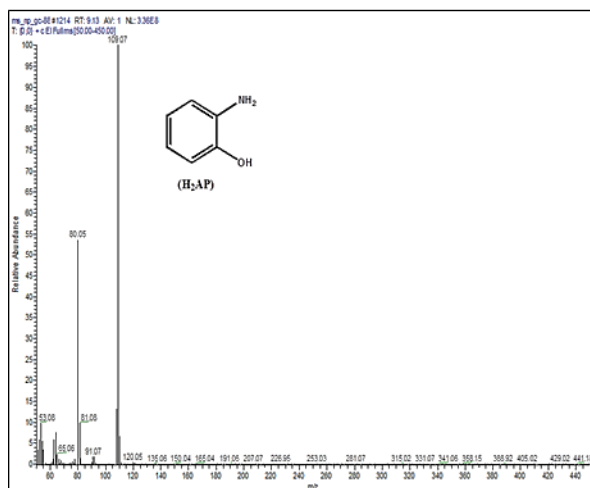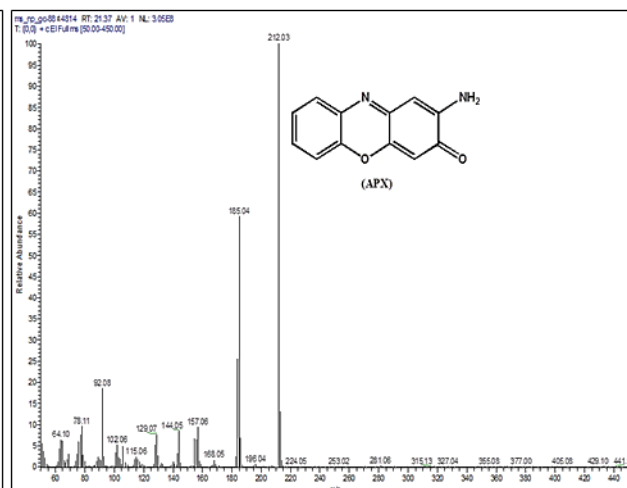

**Figure S16.** Reaction product analysis by GC-MS. Representative GC-MS chromatogram and mass spectra for catalytic reaction with **1**•MeOH are shown here.

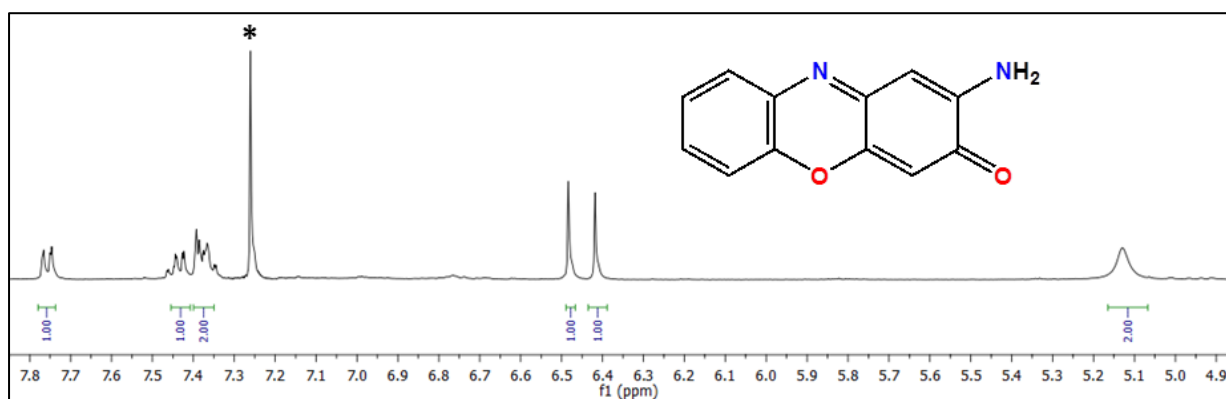

**Figure S17.**  $^1\text{H}$  NMR (400 MHz, 300 K) spectrum of 2-amino-phenoxazine-3-one (APX) in  $\text{CDCl}_3$ . Asterisk (\*) denotes solvent residual peak.

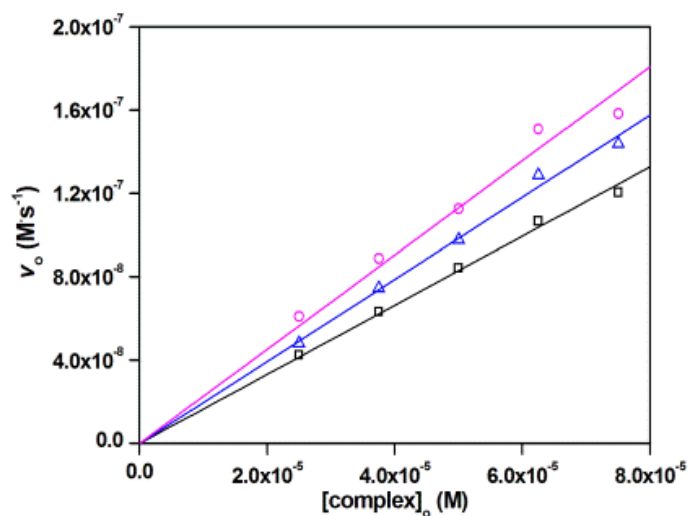

**Figure S18.** Dependence of initial rate on the concentration of complex (black block for **1·MeOH**; blue triangle for **2·H<sub>2</sub>O**; magenta circle for **3**) for the aerobic oxidation of H<sub>2</sub>AP. Conditions: [H<sub>2</sub>AP]<sub>0</sub> = 3.75 × 10<sup>-3</sup> M, [complex]<sub>0</sub> = 2.5 × 10<sup>-5</sup> to 7.5 × 10<sup>-5</sup> M in air-saturated MeOH-H<sub>2</sub>O (33%, v/v; pH 8.6) at 30 °C. Symbols and solid lines represent the experimental data and linear fit, respectively.

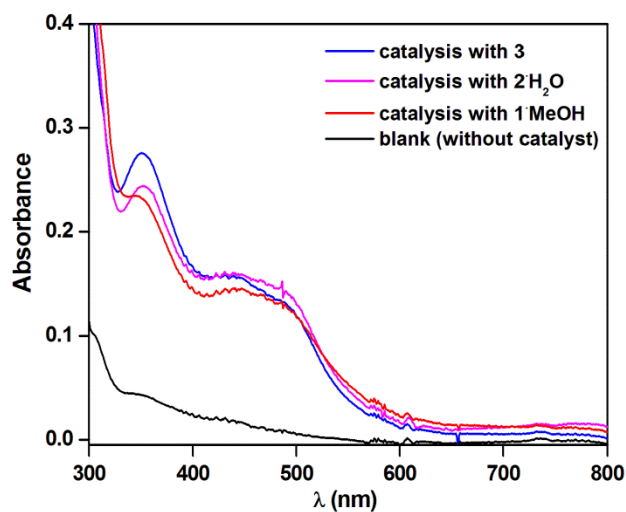

**Figure S19.** Detection of H<sub>2</sub>O<sub>2</sub> in catalytic solutions by iodide titration: electronic spectra of the formation of I<sub>3</sub><sup>-</sup> (experimental procedure is described in the main text).

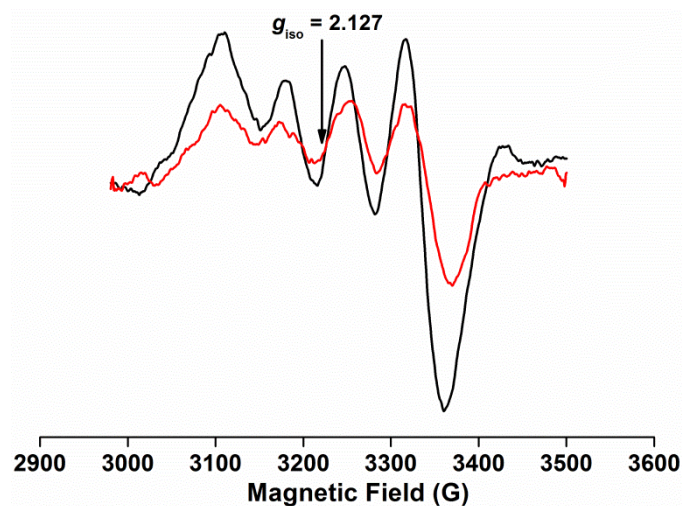

**Figure S20.** X-band EPR spectra of complex **1·MeOH** (1 mM; black line) and after treating with 2-aminophenol (5 mM; red line) at 298 K in methanol. Microwave frequency  $\approx 9.61$  GHz, microwave power = 15 mW, modulation frequency = 5 kHz, modulation amplitude = 3 G.

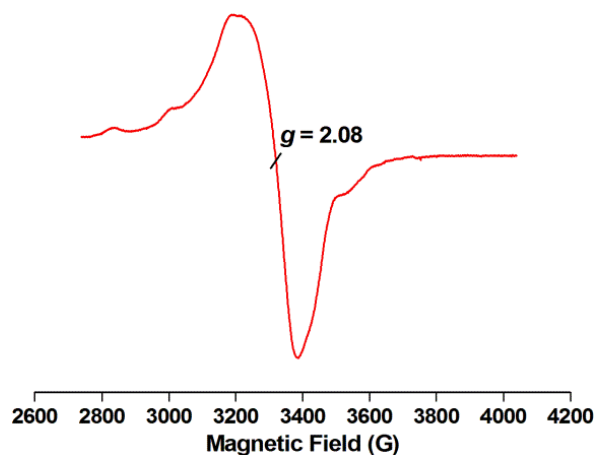

**Figure S21.** X-band EPR spectrum of reaction mixture containing complex **1·MeOH** (1 mM) and 2-anilino-4,6-di-*tert*-butylphenol (10 mM) at 77 K in methanol. Microwave frequency  $\approx 9.67$  GHz, microwave power = 15 mW, modulation frequency = 5 kHz, modulation amplitude = 3 G.

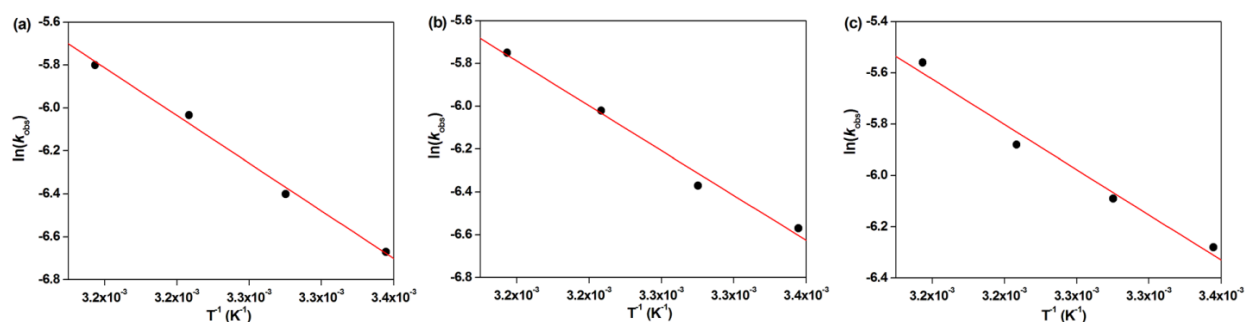

**Figure S22.** Arrhenius plots for the oxidation of 2-aminophenol catalysed by (a) **1·MeOH**, (b) **2·H<sub>2</sub>O** and (c) **3** in MeOH-H<sub>2</sub>O (33%, v/v; pH 8.6).

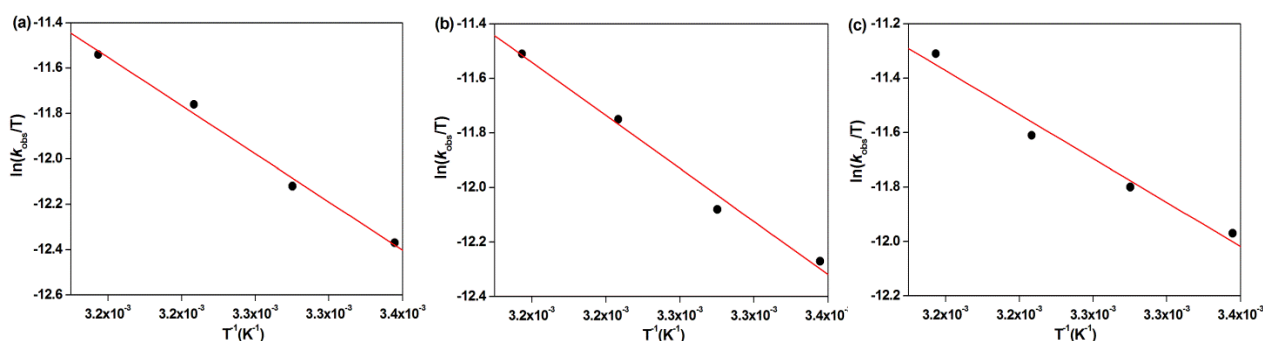

**Figure S23.** Eyring plots for the oxidation of 2-aminophenol catalysed by (a) **1·MeOH**, (b) **2·H<sub>2</sub>O** and (c) **3** in MeOH-H<sub>2</sub>O (33%, v/v; pH 8.6).

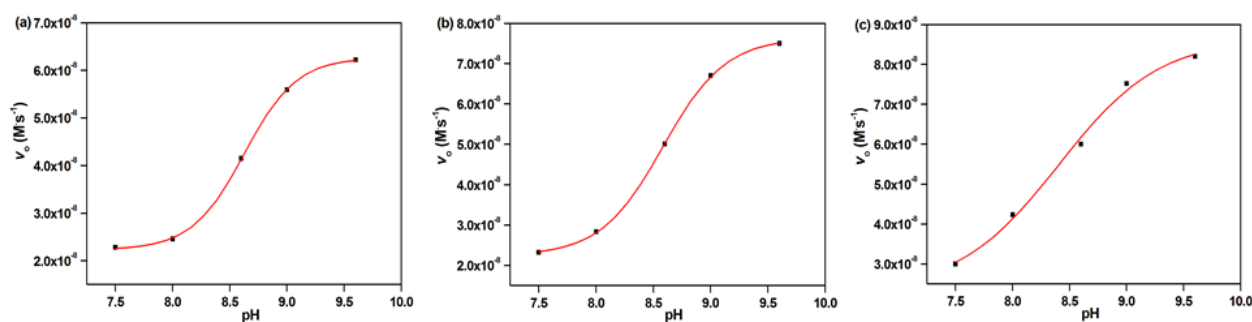

**Figure S24.** Dependence of rate on pH for the oxidation of 2-aminophenol catalysed by (a) **1·MeOH**, (b) **2·H<sub>2</sub>O** and (c) **3** in MeOH-H<sub>2</sub>O (33%, v/v; 30 °C).

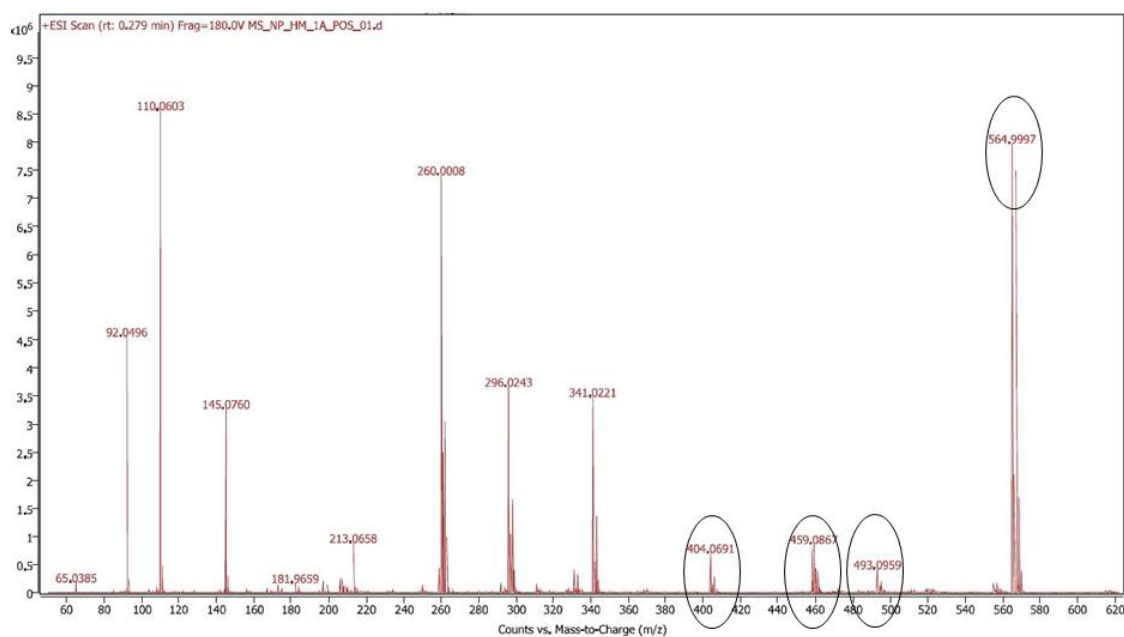

**Figure S25.** ESI-MS spectrum of a 1:10 mixture of complex **1·MeOH** and 2-aminophenol in methanol-water.

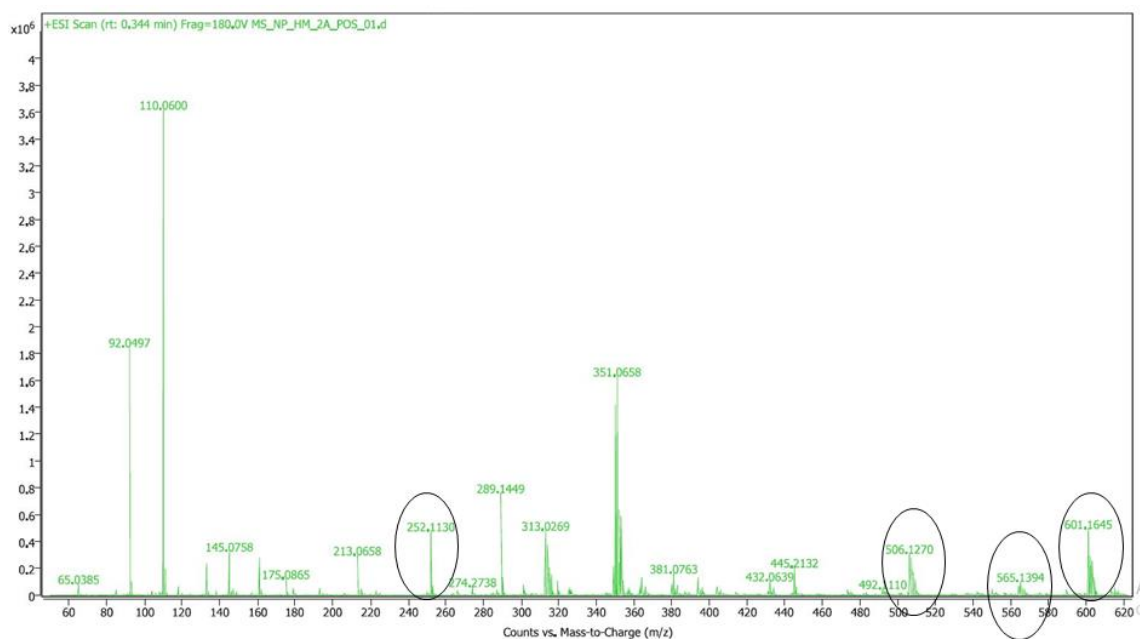

**Figure S26.** ESI-MS spectrum of a 1:10 mixture of complex **2·H<sub>2</sub>O** and 2-aminophenol in methanol-water.

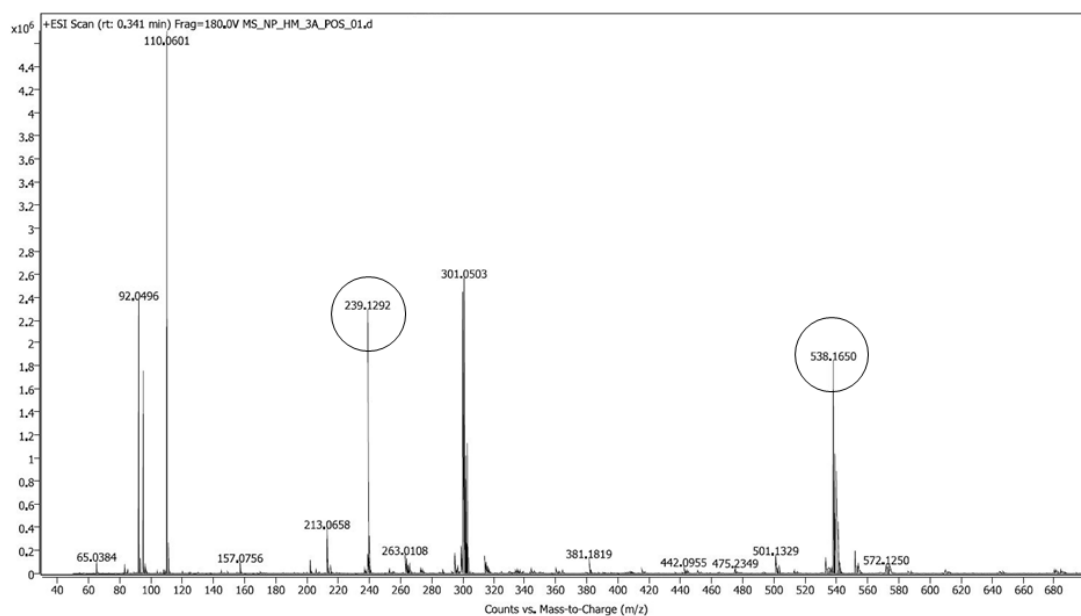

**Figure S27.** ESI-MS spectrum of a 1:10 mixture of complex **3** and 2-aminophenol in methanol-water.

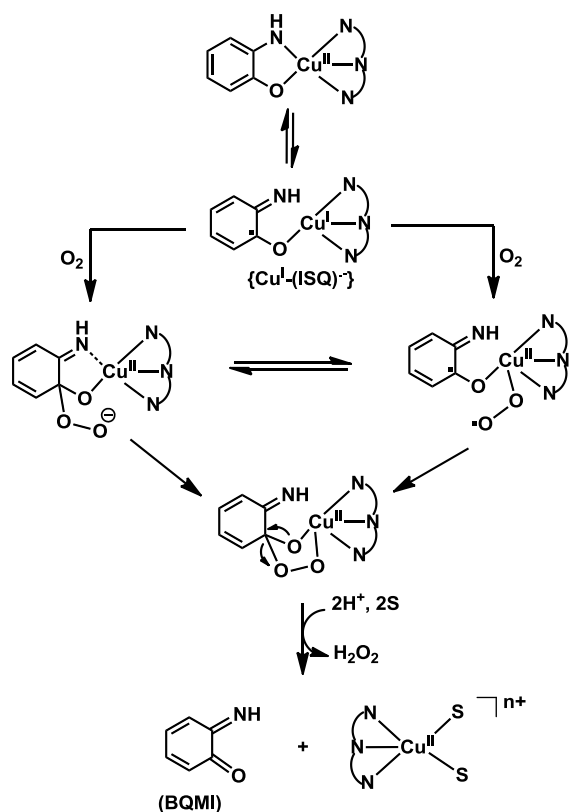

**Figure S28.** Possible reaction pathway of  $\{\text{Cu}^{\text{I}}\text{-}\{\text{ISQ}\}^{\text{-}}\}$  with dioxygen to form BQMI. N-N-N represents tridentate ligand  $\text{L}^1$  or  $\text{L}^2$  or  $\text{L}^3$  for complexes **1**·MeOH or **2**·H<sub>2</sub>O or **3**, respectively. S represents Cl<sup>-</sup>/water/methanol and  $n$  varies from 0 to 2 depending on the types of ligand, S.

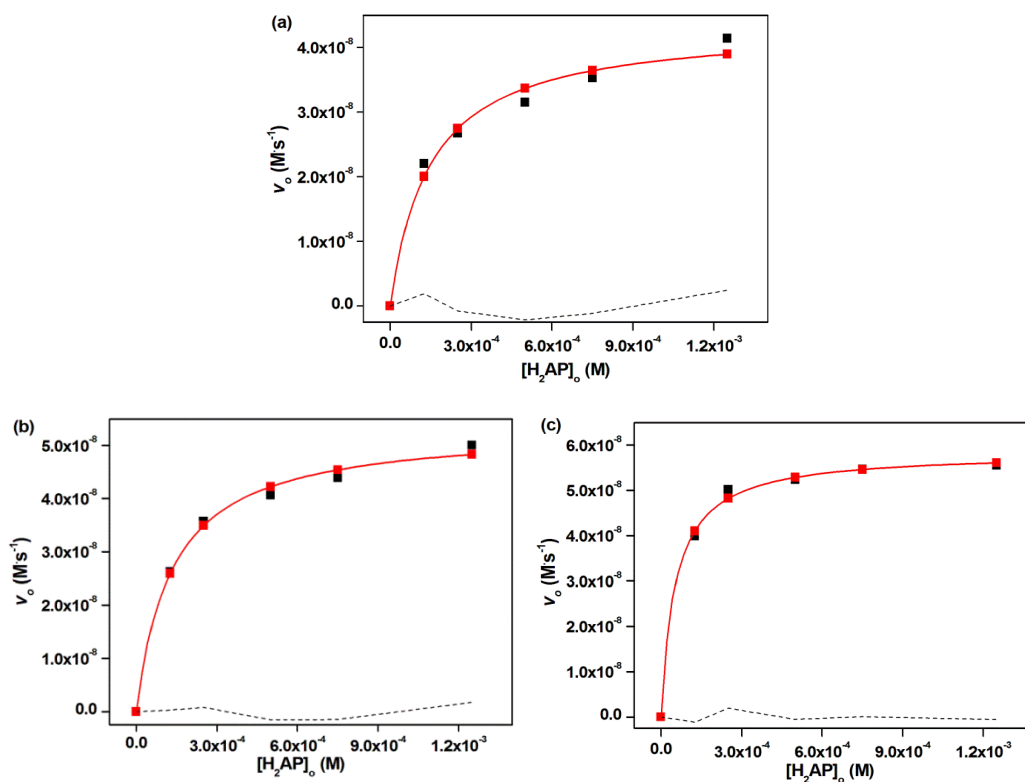

**Figure S29.** Nonlinear least squares fitting using equation 2 (described in the main text) to the plots of  $v_0$  vs  $[\text{H}_2\text{AP}]_0$  for catalytic reactions with complexes (a) **1·MeOH**, (b) **2·H<sub>2</sub>O** and (c) **3**. Black square: experimental data; red square: calculated value; red line: theoretical fitting; black dashed line: residual plot.

**Derivation of equation (2):**

Equation (2) was derived by considering the following reaction model,

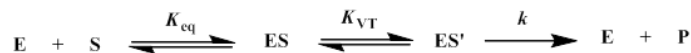

where,  $E$  &  $S$  represent catalyst and substrate, respectively;  $ES$  and  $ES'$  are the two valence tautomers of complex-substrate adduct.

$$K_{eq} = \frac{[ES]}{[E][S]} \quad \dots (i); \quad K_{VT} = \frac{[ES']}{[ES]} \quad \dots (ii)$$

From equation (i) and (ii) we obtain:  $[E] = \frac{[ES']}{K_{eq}K_{VT}[S]} \quad \dots (iii)$

To derive the kinetic equation corresponding to the proposed mechanistic model, we express the total concentration of catalyst as:

$$\begin{aligned} [E]_0 &= [E] + [ES] + [ES'] \\ \text{so, } [ES'] &= [E]_0 - [E] - [ES] \\ \text{so, } [ES'] &= [E]_0 - \frac{[ES']}{K_{eq}K_{VT}[S]} - \frac{[ES']}{K_{VT}} \\ \text{so, } [ES'] \left\{ 1 + \frac{1}{K_{eq}K_{VT}[S]} + \frac{1}{K_{VT}} \right\} &= [E]_0 \\ \text{so, } [ES'] &= \frac{K_{eq}K_{VT}[E]_0[S]}{1 + K_{eq}[S] + K_{eq}K_{VT}[S]} \quad \dots (iv) \end{aligned}$$

At initial stage of reaction it is assumed that the decrease of initial concentration of substrate is negligible. Then the initial rate of reaction can be expressed as,

$$v_0 = k[ES'] = \frac{kK_{eq}K_{VT}[E]_0[S]_0}{1 + K_{eq}[S]_0 + K_{eq}K_{VT}[S]_0} \quad \dots (v)$$

Equation (v) now can be represented in the form of equation (2) as shown in the main text.
